# Supplementary material
Source: ML conference proceedings conference paper supplement (https://proceedings.neurips.cc/paper_files/paper/2019/hash/f87522788a2be2d171666752f97ddebb-Abstract.html)

# DFNets: Spectral CNNs for Graphs with Feedback-Looped Filters

Asiri Wijesinghe and Qing Wang

Research School of Computer Science, ANU College of Engineering and Computer Science  
The Australian National University, Canberra ACT 0200, Australia  
{asiri.wijesinghe, qing.wang}@anu.edu.au

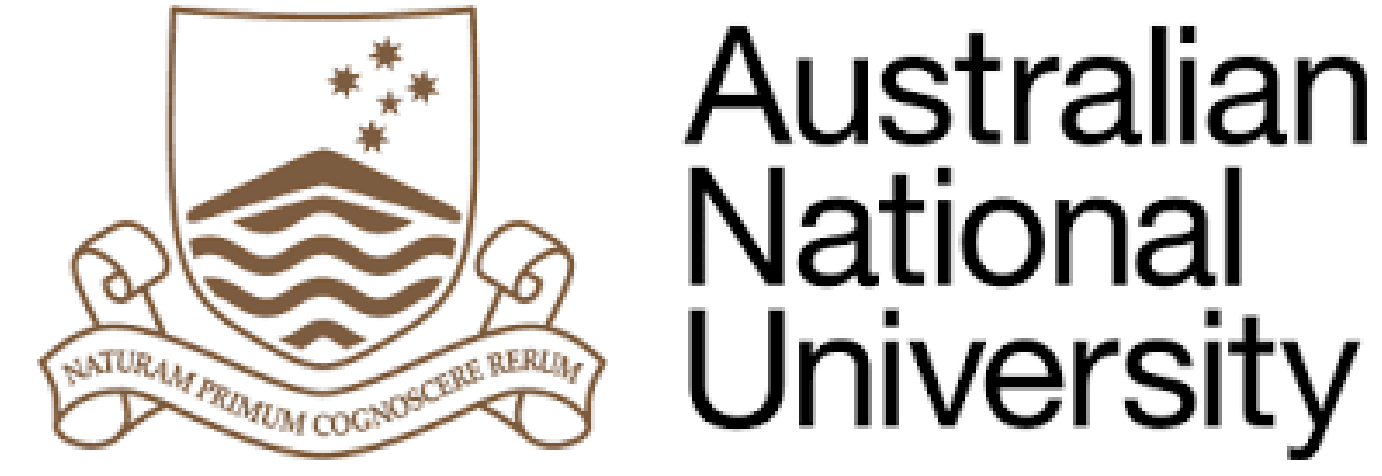

## Introduction

- We propose *Distributed Feedback-Looped Network* (DFNet) which is a novel spectral CNN architecture with feedback-looped graph filters.

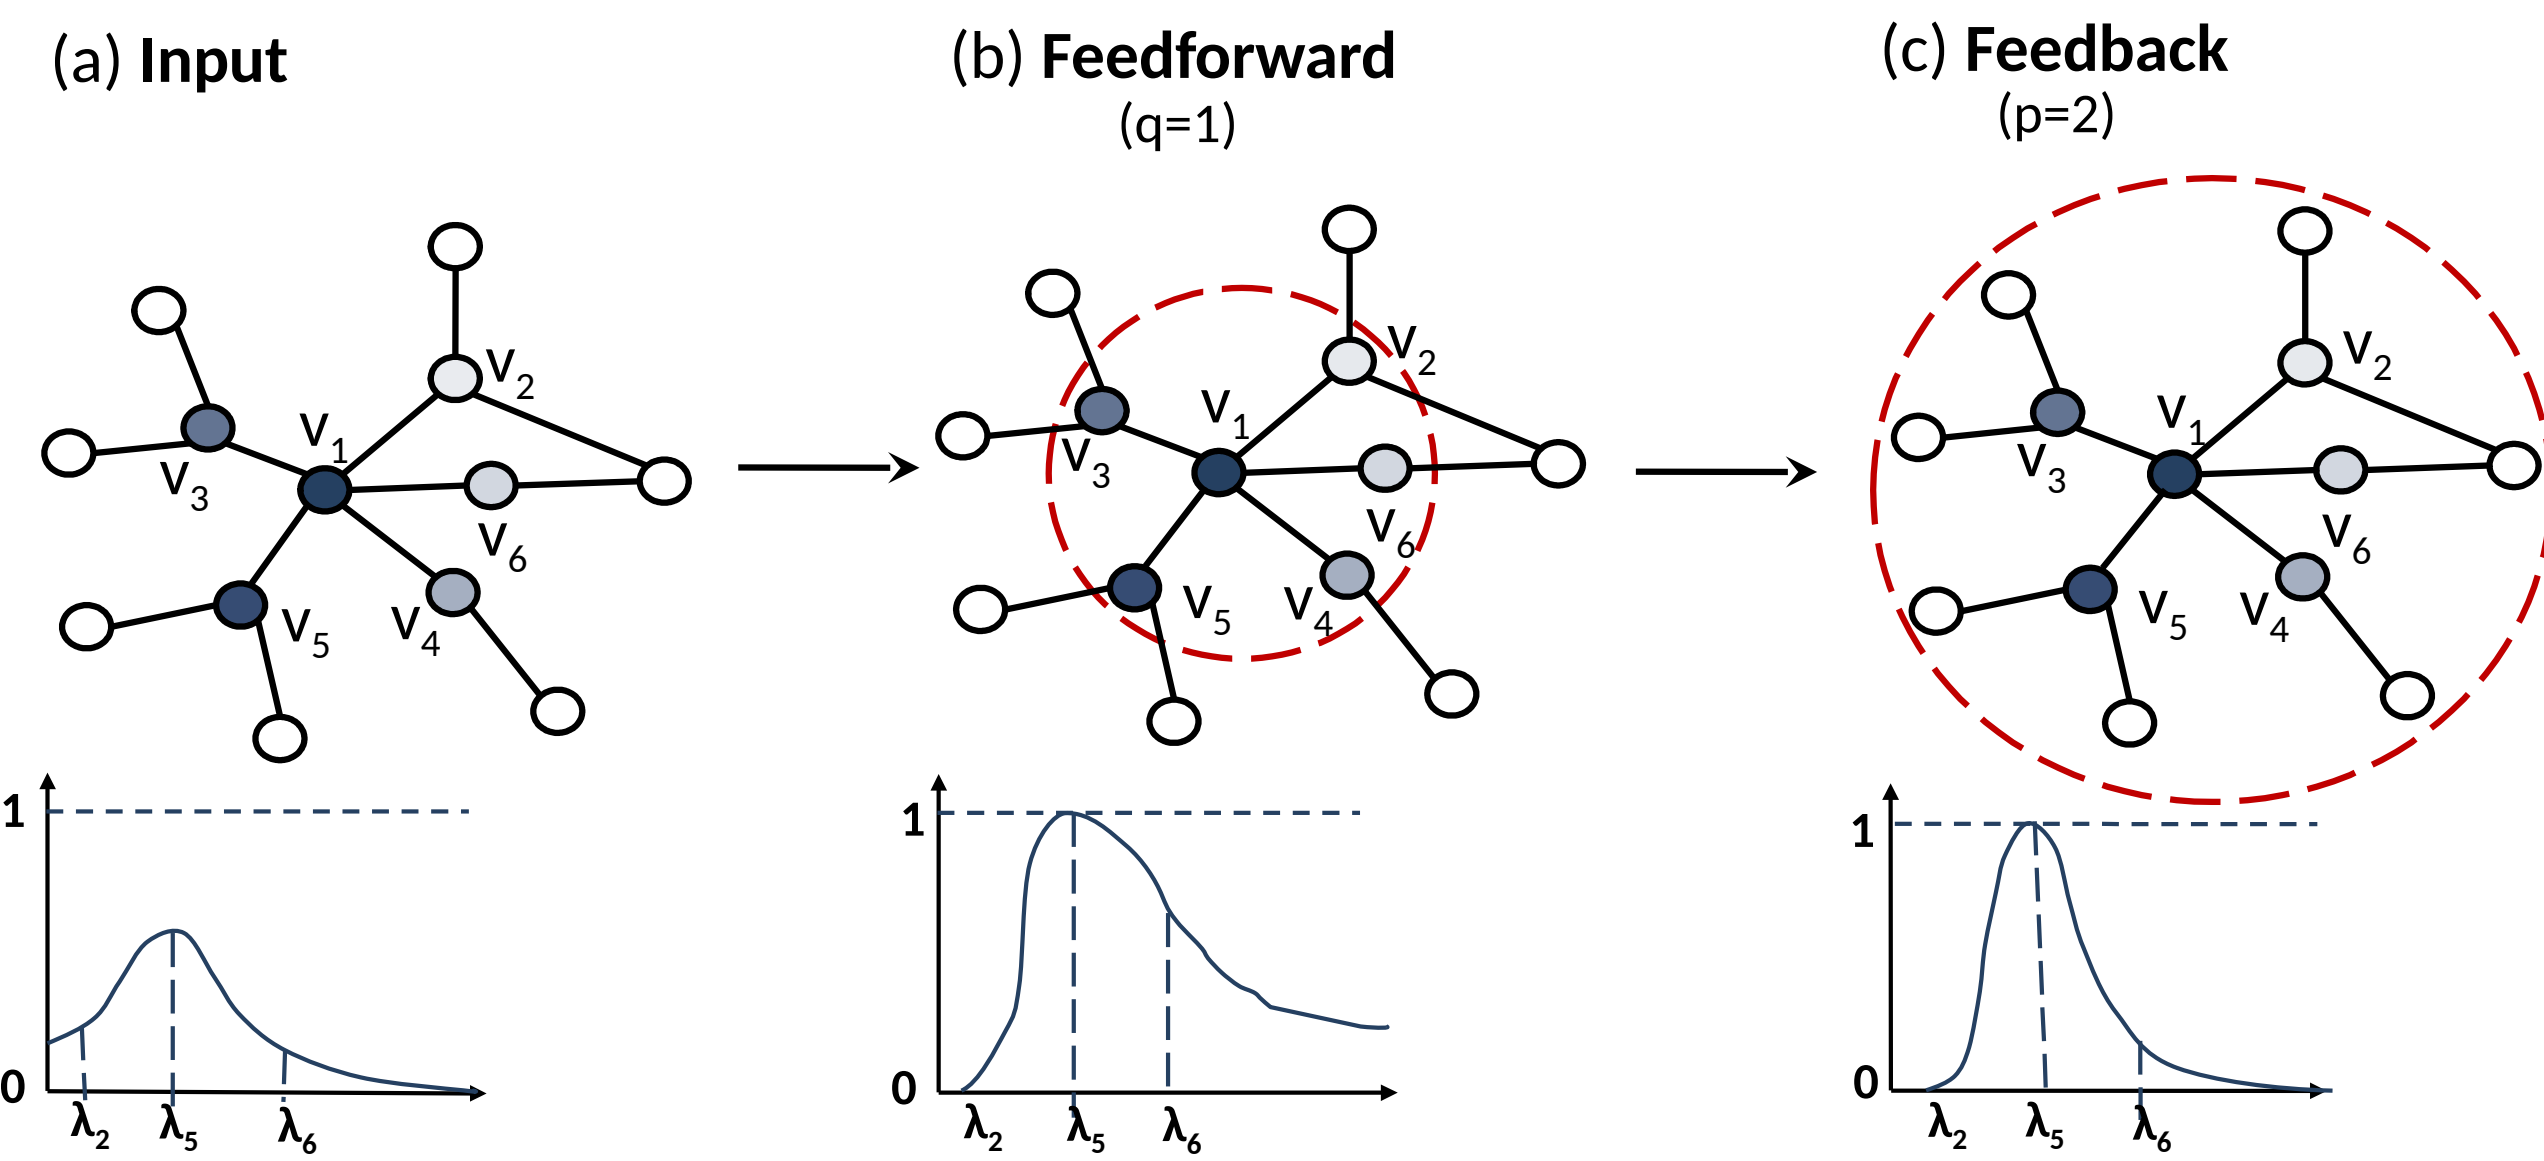

## Feedback-Looped Filters

- Feedback-looped filters belong to a class of Auto Regressive Moving Average (ARMA) filters.

$$h_{\psi, \phi}(L)x = \left(I + \sum_{j=1}^p \psi_j L^j\right)^{-1} \left(\sum_{j=0}^q \phi_j L^j\right)x, \quad (1)$$

where  $p$  and  $q$  refer to the *feedback* and *feedforward* degrees, respectively.  $\psi \in \mathbb{C}^p$  and  $\phi \in \mathbb{C}^{q+1}$  are two vectors of complex coefficients.

- The frequency response of feedback-looped filters is defined as:

$$h(\lambda_i) = \frac{\sum_{j=0}^q \phi_j \lambda_i^j}{1 + \sum_{j=1}^p \psi_j \lambda_i^j}. \quad (2)$$

- To circumvent the issue of matrix inversion for large graphs, *feedback-looped filters* use the following approximation:

$$\bar{x}^{(0)} = x \text{ and } \bar{x}^{(t)} = -\sum_{j=1}^p \psi_j \tilde{L}^j \bar{x}^{(t-1)} + \sum_{j=0}^q \phi_j \tilde{L}^j x, \quad (3)$$

where  $\tilde{L} = \hat{L} - (\frac{\lambda_{max}}{2})I$ ,  $\hat{L} = I - \hat{D}^{-1/2} \hat{A} \hat{D}^{-1/2}$ ,  $\hat{A} = A + I$ ,  $\hat{D}_{ii} = \sum_j \hat{A}_{ij}$  and  $\lambda_{max}$  is the largest eigenvalue of  $\hat{L}$ .

- To alleviate the issues of gradient vanishing/ exploding and numerical instabilities, we use two techniques:
  - Scaled-normalization technique:** centralizes the eigenvalues of the Laplacian  $\hat{L}$  and reduces its spectral radius bound.
  - Cut-off frequency technique:** allows the generation of ideal high-pass filters so as to sharpen a signal by amplifying its graph Fourier coefficients.

## Coefficient Optimization

- We aim to find the optimal coefficients  $\psi$  and  $\phi$  that make the frequency response as close as possible to the desired frequency response,

$$\hat{e}(\tilde{\lambda}_i) = \hat{h}(\tilde{\lambda}_i) - \frac{\sum_{j=0}^q \phi_j \tilde{\lambda}_i^j}{1 + \sum_{j=1}^p \psi_j \tilde{\lambda}_i^j} \quad (4)$$

- Linear approximation of the error (w.r.t.  $\psi$  and  $\phi$ ) is defined as:

$$e(\tilde{\lambda}_i) = \hat{h}(\tilde{\lambda}_i) + \hat{h}(\tilde{\lambda}_i) \sum_{j=1}^p \psi_j \tilde{\lambda}_i^j - \sum_{j=0}^q \phi_j \tilde{\lambda}_i^j. \quad (5)$$

- Let  $\alpha \in \mathbb{R}^{n \times p}$  with  $\alpha_{ij} = \tilde{\lambda}_i^j$  and  $\beta \in \mathbb{R}^{n \times (q+1)}$  with  $\beta_{ij} = \tilde{\lambda}_i^{j-1}$  be two Vandermonde-like matrices. The coefficients  $\psi$  and  $\phi$  can be learned by minimizing  $e$  as a convex constrained least-squares optimization problem:

$$\begin{aligned} &\text{minimize}_{\psi, \phi} \|\hat{h} + \text{diag}(\hat{h})\alpha\psi - \beta\phi\|_2 \\ &\text{subject to } \|\alpha\psi\|_\infty \leq \gamma \text{ and } \gamma < 1 \end{aligned} \quad (6)$$

## Spectral Convolutional Layer

- Let  $\mathbf{P} = -\sum_{j=1}^p \psi_j \tilde{L}^j$  and  $\mathbf{Q} = \sum_{j=0}^q \phi_j \tilde{L}^j$ . The propagation rule of a spectral convolutional layer is defined as:

$$\bar{X}^{(t+1)} = \sigma(\mathbf{P}\bar{X}^{(t)}\theta_1^{(t)} + \mathbf{Q}X\theta_2^{(t)} + \mu(\theta_1^{(t)}; \theta_2^{(t)}) + b), \quad (7)$$

where  $\sigma$  refers to a non-linear activation function and

$\bar{X}^{(0)} = X \in \mathbb{R}^{n \times f}$ .  $\bar{X}^{(t)}$  is a matrix of activations in the  $t^{th}$  layer.

## Theoretical Analysis

- DFNets has several nice properties:

- Improved localization
- Linear convergence
- Efficient computation
- Universal design
- Guaranteed stability
- Dense architecture

| Spectral Graph Filter                  | Type       | Learning Complexity | Time Complexity | Memory Complexity |
|----------------------------------------|------------|---------------------|-----------------|-------------------|
| Chebyshev filters                      | Polynomial | $O(k)$              | $O(km)$         | $O(m)$            |
| Lanczos filters                        |            | $O(k)$              | $O(km^2)$       | $O(m^2)$          |
| Cayley filters                         | Rational   | $O((r+1)k)$         | $O((r+1)km)$    | $O(m)$            |
| ARMA <sub>1</sub> filters              |            | $O(t)$              | $O(tm)$         | $O(m)$            |
| $d$ parallel ARMA <sub>1</sub> filters |            | $O(t)$              | $O(tm)$         | $O(dm)$           |
| Feedback-looped filters (ours)         |            | $O(tp+q)$           | $O((tp+q)m)$    | $O(m)$            |

## Numerical Experiments

- Comparison with the state-of-the-art methods.

| Model             | Cora              | Citeseer          | Pubmed            | NELL              |
|-------------------|-------------------|-------------------|-------------------|-------------------|
| SemiEmb           | 59.0              | 59.6              | 71.1              | 26.7              |
| LP                | 68.0              | 45.3              | 63.0              | 26.5              |
| DeepWalk          | 67.2              | 43.2              | 65.3              | 58.1              |
| ICA               | 75.1              | 69.1              | 73.9              | 23.1              |
| Planetoid*        | 64.7              | 75.7              | 77.2              | 61.9              |
| Chebyshev         | 81.2              | 69.8              | 74.4              | -                 |
| GCN               | 81.5              | 70.3              | 79.0              | 66.0              |
| LNet              | 79.5              | 66.2              | 78.3              | -                 |
| AdaLNet           | 80.4              | 68.7              | 78.1              | -                 |
| CayleyNet         | 81.9*             | -                 | -                 | -                 |
| ARMA <sub>1</sub> | 83.4              | 72.5              | 78.9              | -                 |
| GAT               | 83.0              | 72.5              | 79.0              | -                 |
| GCN + DenseBlock  | 82.7 ± 0.5        | 71.3 ± 0.3        | 81.5 ± 0.5        | 66.4 ± 0.3        |
| GAT + Dense Block | 83.8 ± 0.3        | 73.1 ± 0.3        | 81.8 ± 0.3        | -                 |
| DFNet (ours)      | <b>85.2 ± 0.5</b> | <b>74.2 ± 0.3</b> | <b>84.3 ± 0.4</b> | <b>68.3 ± 0.4</b> |
| DFNet-ATT (ours)  | <b>86.0 ± 0.4</b> | <b>74.7 ± 0.4</b> | <b>85.2 ± 0.3</b> | <b>68.8 ± 0.3</b> |
| DF-ATT (ours)     | 83.4 ± 0.5        | 73.1 ± 0.4        | <b>82.3 ± 0.3</b> | <b>67.6 ± 0.3</b> |

- Comparison under different polynomial orders (DFNet).

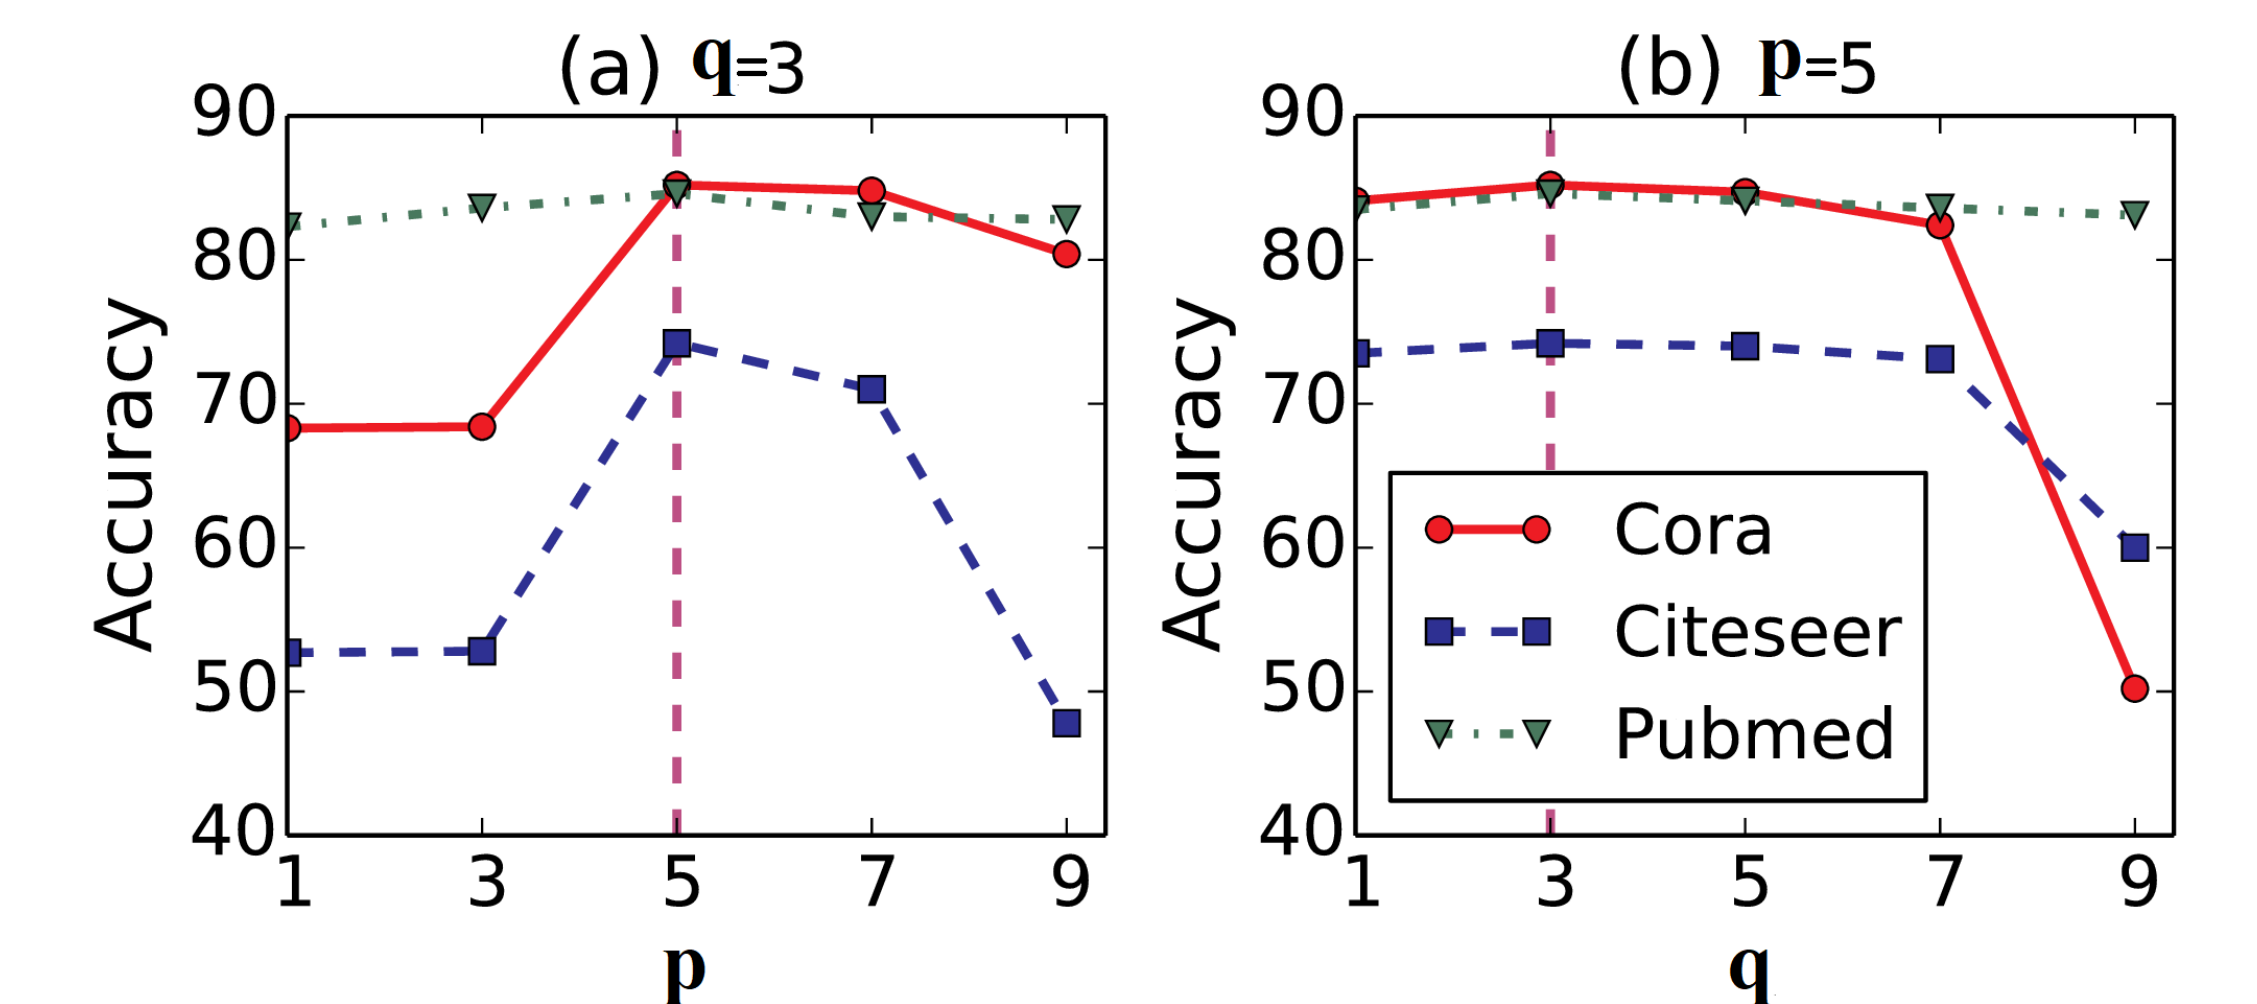

- Node embeddings (top: Pubmed ; bottom: Cora).

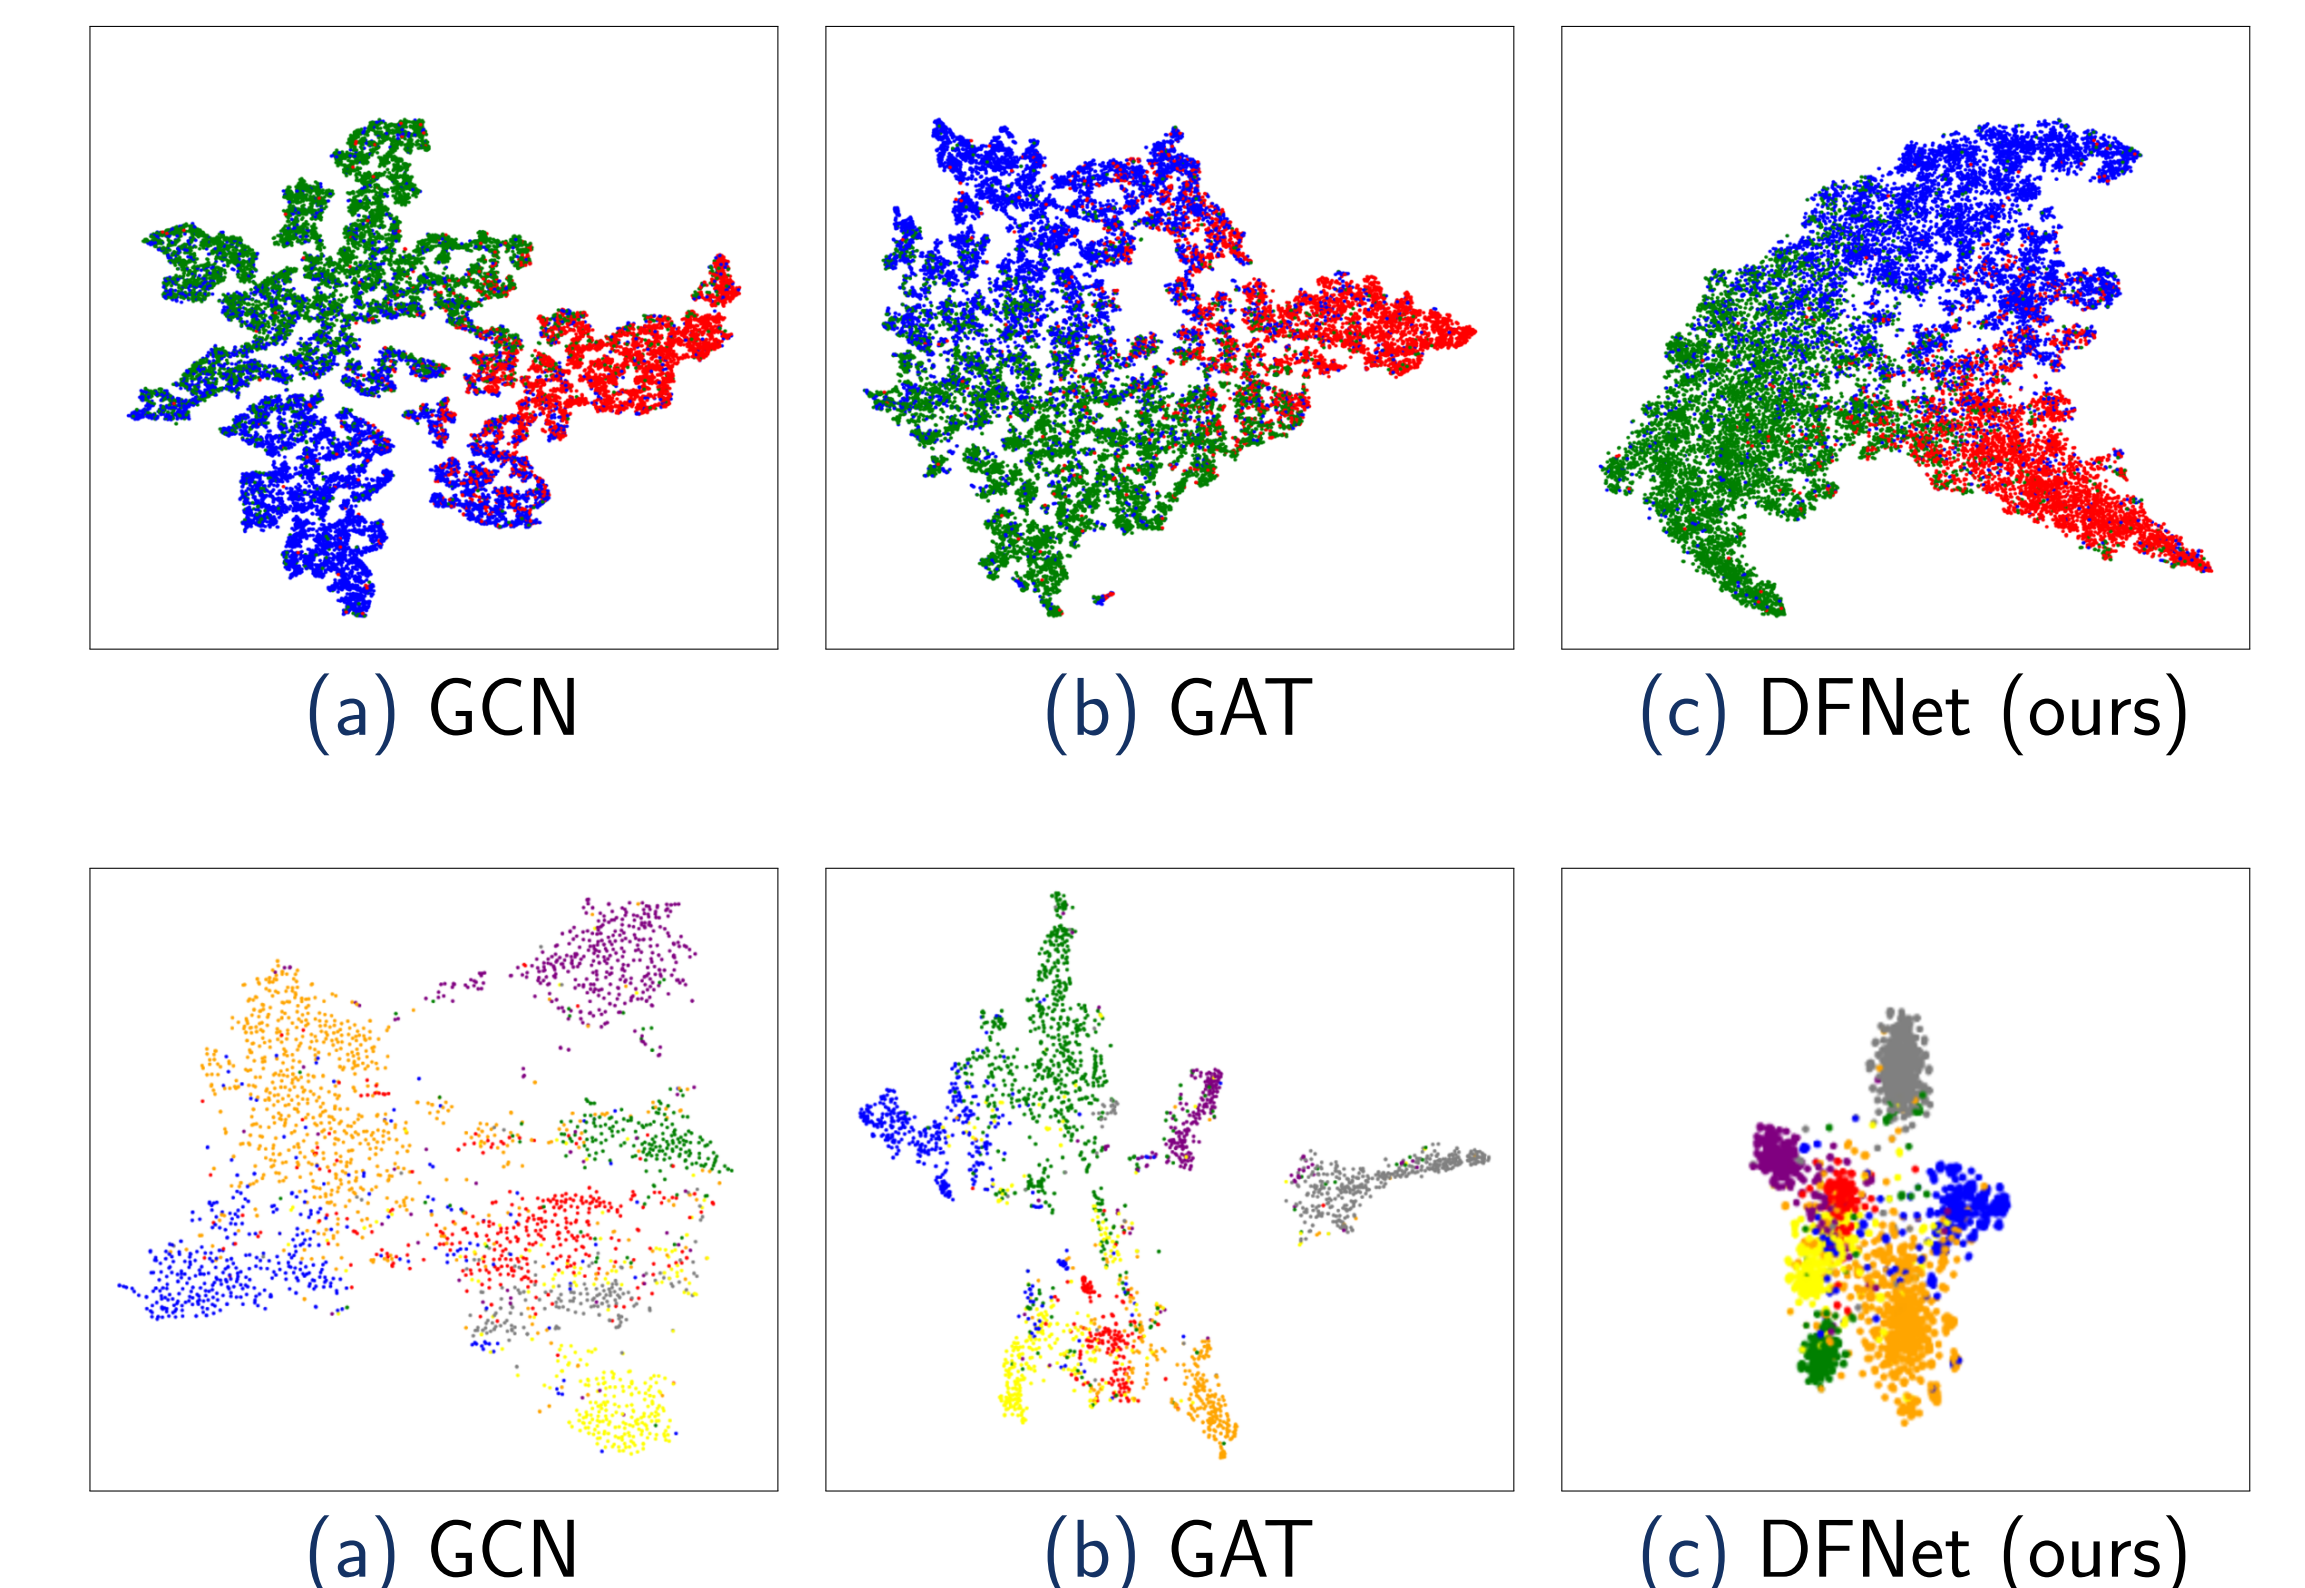

Supplement: Supplementary file [file f87522788a2be2d171666752f97ddebb-Supplemental.zip]
